# Supplementary material for: The SEPALLATA-like gene HrSEP1 in Hippophae rhamnoides regulates flower development by interacting with other MADS-box subfamily genes
Source: Front Plant Sci. 2025 Jan 29;15:1503346. doi: 10.3389/fpls.2024.1503346 (PMC11813943; doi:10.3389/fpls.2024.1503346)
Supplement: Supplementary file 1 [file Table1.xlsx]

## Sheet: Sheet1
All primer sequences related to this article
Experiment	Name	Sequence（5’→ 3’）		Name	Sequence （5’→ 3’）
Gene cloning	HrSEP1-F	ATGGGTAGAGGAAGAGTAGAGTTG		HrSEP1-R	TCAAAGCATCCAACCAGGG
subcellular localization	p1300-HrSEP1-F	CGGTACCCGGGGATCCATGGGTAGAGGAAGAGTAGAGTTGA		p1300-HrSEP1-R	TGCTCACCATGTCGACAAGCATCCAACCAGGGATGAA
yeast two hybrid	BD-HrSEP1-F	CGGAATTCATGGGTAGAGGAAGAGTAGAGTTG		BD-HrSEP1-R	CGGGATCCTCAAAGCATCCAACCAGGG
	AD-HrAP1-F	CGCCATATGATGGGAAGGGTTAGGGT		AD-HrAP1-R	CCGCTCGAGTCAAGCACCATAGCAACC
	AD-HrSOC1-F	CCATCGATATGGGAAGAGGTAAAGTAGAGAT		AD-HrSOC1-R	CGGGATCCTTATATGTCAAAGCATCCGG
	AD-HrSVP-F	CGCCATATGATGGTTCGAGATAAAATACAG		AD-HrSVP-R	CCGCTCGAGTTAGCCAGAATATGGTAGC
Bifc	pXY104-HrSEP1-F	TTACAATTACAGGTACCCGGGATGGGTAGAGGAAGAGTAGAGTTGA		pXY104-HrSEP1-R	GCCACCGCCGTCGACTCTAGAAAGCATCCAACCAGGGATGAA
	pXY106-HrAP1-F	ATCGAGGACGCCGGCGGATCCATGGGAAGGGTTAGGGT		pXY106-HrAP1-R	ACGAAAGCTCTGCAGGTCGACTCAAGCACCATAGCAACC
	pXY106-HrSOC1-F	ATCGAGGACGCCGGCGGATCCATGGGAAGAGGTAAAGTAGAGAT		pXY106-HrSOC1-R	ACGAAAGCTCTGCAGGTCGACTTATATGTCAAAGCATCCGG
	pXY106-HrSVP-F	ATCGAGGACGCCGGCGGATCCATGGTTCGAGATAAAATACAG		pXY106-HrSVP-R	ACGAAAGCTCTGCAGGTCGACTTAGCCAGAATATGGTAGC
genetic transformation	pCAMBIA3301-HrSEP1-F	CATGCCATGGATGGGTAGAGGAAGAGTAGAGTTG		pCAMBIA3301-HrSEP1-R	GAAGATCTTCAAAGCATCCAACCAGGG
for qRT-PCR	QHrSEP1-F	GGGCGCAAAACATGGGTTAT		QHrSEP1-R	AATTTGCAAGGAGGGGTTGC
	QNtAP1-F	ACTTCCTCTTCTCTCAGCCTCTTCC		QNtAP1-R	GCTCGTTTCTCCTCTCTTGTTGGG
	QNtSVP-F	GCAACAGCGAGGCAGATAACATTC		QNtSVP-R	TGCTGGAGCTGGCATATTGAAAGAG
	QNtSOC1-F	TTGTGATGCTGAGGTTGCTCTTCTC		QNtSOC1-R	CTTTGGAGTTTGCTGGCTTGCTTC
	QNtActin-F	AGACATTCAACGTTCCGGCT		QNtActin-R	GCATGACCCTCGTAGATGGG
